# Supplementary material for: UVB upconversion of LiYO2:Ho3+,Gd3+ for application in luminescence thermometry
Source: Royal Society of Chemistry journal article supplement (doi:10.1039/d3dt01690k), 2023-01-01
Supplement: d3dt01690k1.pdf [file d3dt01690k1.pdf]

## Supplementary Information

# UVB upconversion of $\text{LiYO}_2:\text{Ho}^{3+},\text{Gd}^{3+}$ for application in luminescence thermometry

Shanshan Zhao,<sup>1</sup> Benchun Li,<sup>1</sup> Tiantian Shen,<sup>1</sup> Fang Fang,<sup>1</sup> Songlin Zhuang,<sup>1</sup> Dawei Zhang,<sup>1</sup> and

Dechao Yu<sup>1,2,\*</sup>

<sup>1</sup>Engineering Research Center of Optical Instrument and System, The Ministry of Education, Shanghai Key Laboratory of Modern Optical Systems, University of Shanghai for Science and Technology, Shanghai 200093, China

<sup>2</sup>State Key Laboratory of Luminescent Materials and Devices, School of Materials Science and Engineering, South China University of Technology, Guangzhou 510641, China

\*Corresponding author: [d.yu@usst.edu.cn](mailto:d.yu@usst.edu.cn)

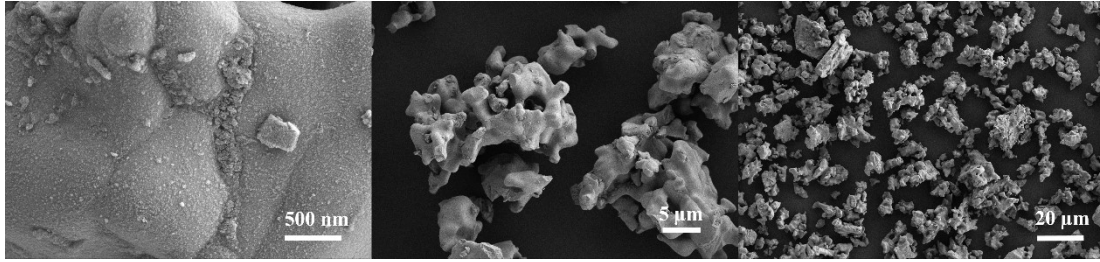

Fig. S1 The SEM images of  $\text{LiYO}_2:0.5\%\text{Ho}^{3+},13\%\text{Gd}^{3+}$  representative at different magnifications.

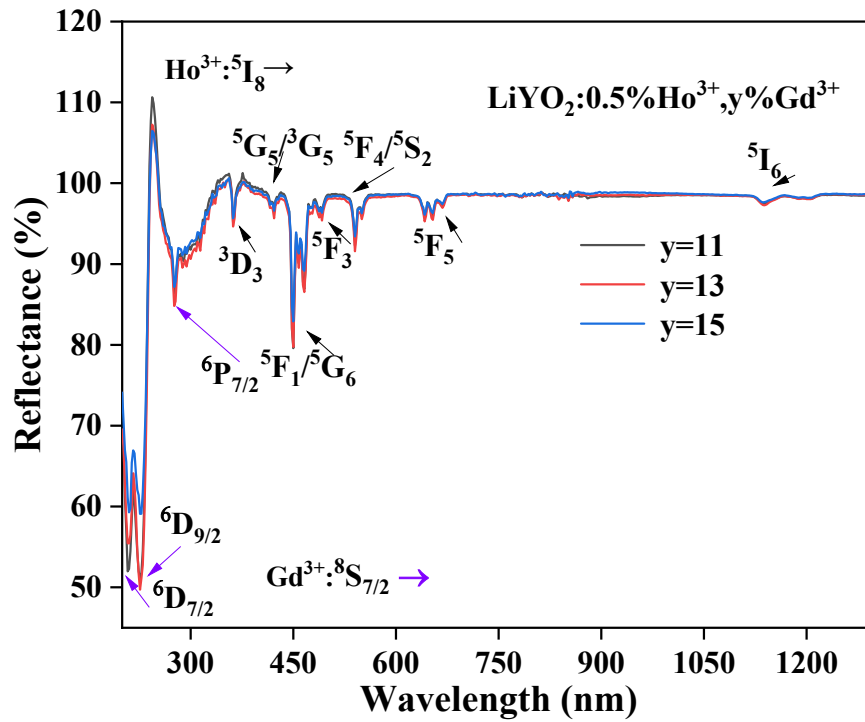

Fig. S2 Diffuse reflectance spectra of the  $\text{LiYO}_2:0.5\%\text{Ho}^{3+},y\%\text{Gd}^{3+}$  ( $y = 11, 13, 15$ ) phosphors.

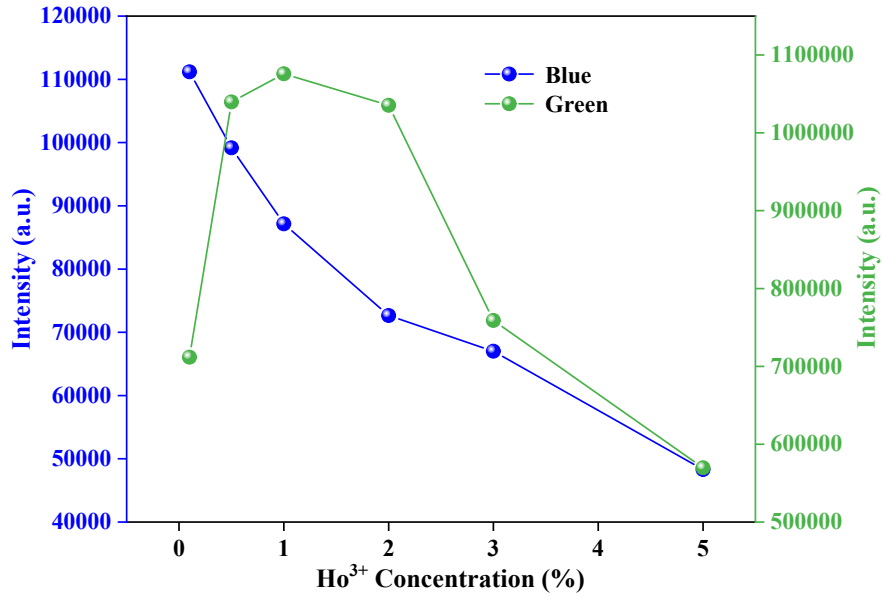

**Fig. S3** Under excitation of 449 nm, the integral intensities of blue emission band over 480-515 nm and that of green emissions over 530-575 nm versus Ho<sup>3+</sup> concentration for LiYO<sub>2</sub>:x%Ho<sup>3+</sup>,14%Gd<sup>3+</sup> (x = 0.1, 0.5, 1, 2, 3, 5).

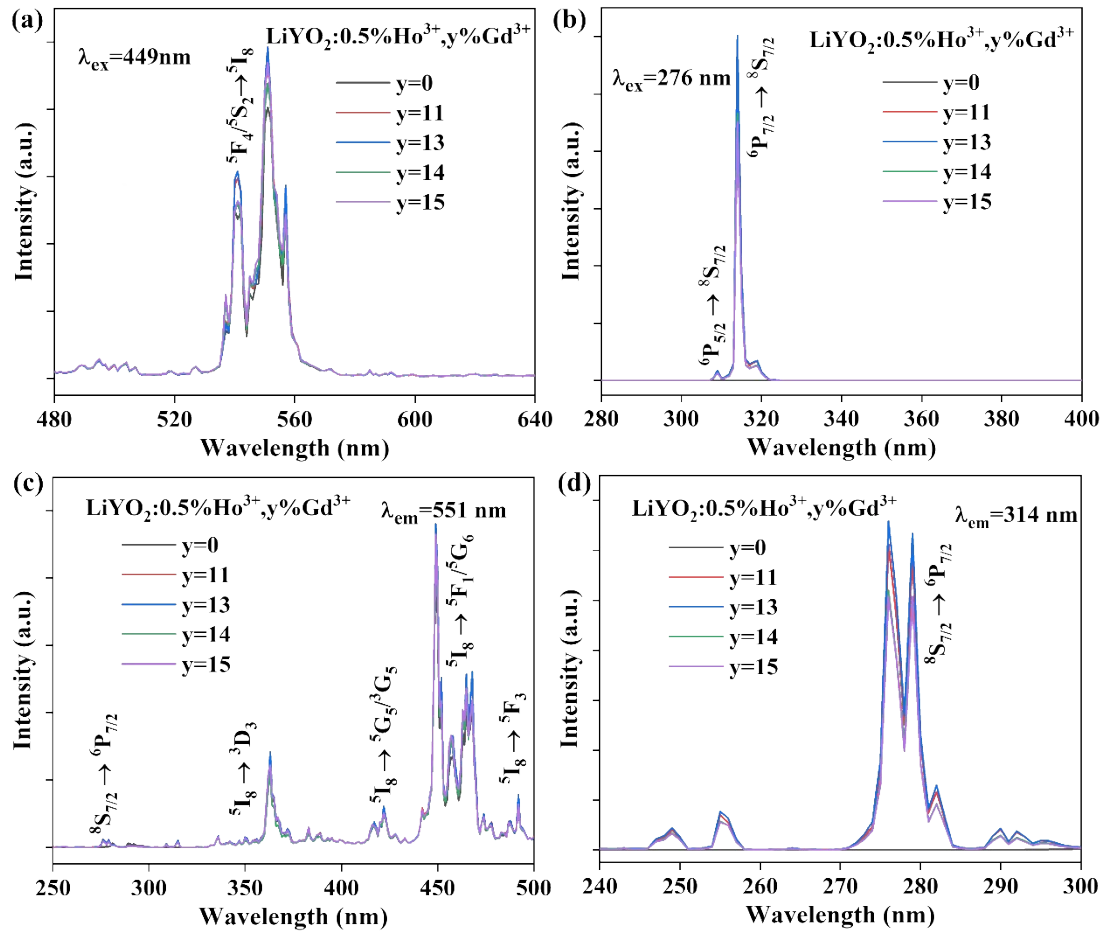

**Fig. S4** (a-b) Photoluminescence spectra of the  $\text{LiYO}_2:0.5\%\text{Ho}^{3+},y\%\text{Gd}^{3+}$  ( $y = 0, 11, 13, 14, 15$ ) phosphors under excitation of (a) 449 nm and (b) 276 nm; (c-d) photoluminescence excitation spectra of the  $\text{LiYO}_2:0.5\%\text{Ho}^{3+},y\%\text{Gd}^{3+}$  ( $y = 11, 13, 14, 15$ ) phosphors monitoring (c) at 314 nm emission and (d) at 551 nm emission, respectively.

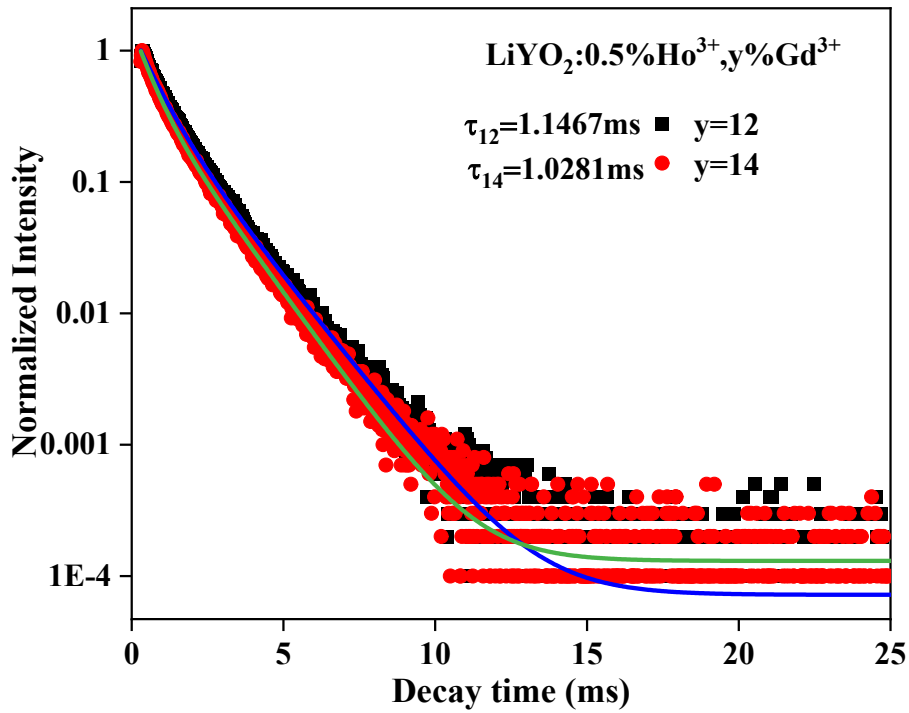

**Fig. S5** Under excitation of a 445 nm pulsed laser, decay curves of the LiYO<sub>2</sub>:0.5%Ho<sup>3+</sup>,y%Gd<sup>3+</sup> (y = 12, 14) phosphors.

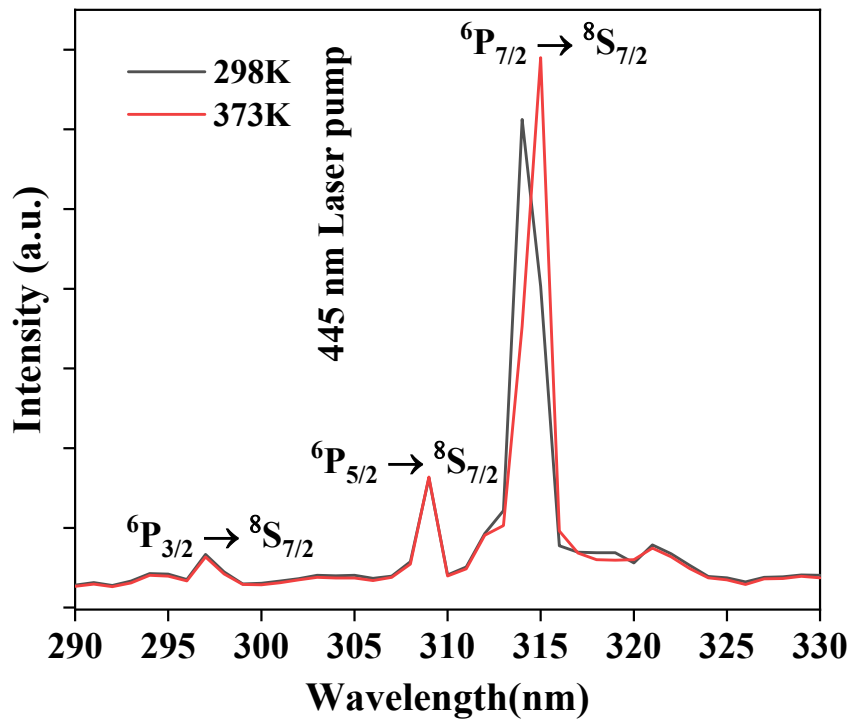

**Fig. S6** UV-B upconversion luminescence spectra of LiYO<sub>2</sub>:2%Ho<sup>3+</sup>,4%Gd<sup>3+</sup> representative measured at 298 and 373 K under excitation of blue ~ 445 nm laser.

**Table S1** Results of EDS mapping of the  $\text{LiYO}_2:0.5\%\text{Ho}^{3+},13\%\text{Gd}^{3+}$  representative

| Elements     | Line type     | Apparent concentration | K ratio | Wt%    | Atomic percentage |
|--------------|---------------|------------------------|---------|--------|-------------------|
| O            | K-line system | 22.07                  | 0.07427 | 24.47  | 66.49             |
| Y            | L-line system | 53.28                  | 0.53278 | 59.41  | 29.05             |
| Gd           | L-line system | 13.82                  | 0.13824 | 15.71  | 4.34              |
| Ho           | L-line system | 0.36                   | 0.00359 | 0.41   | 0.11              |
| Total amount |               |                        |         | 100.00 | 100.00            |

**Table S2** Decay times of the  $\text{LiYO}_2:0.5\%\text{Ho}^{3+},y\%\text{Gd}^{3+}$  ( $y = 10, 11, 13, 15, 16$ ) phosphors

| Phosphors            |                      | $\tau_1$ | $\tau_2$ | $\bar{\tau}$ | $R^2$  |
|----------------------|----------------------|----------|----------|--------------|--------|
| $\text{Ho}^{3+}$ (%) | $\text{Gd}^{3+}$ (%) |          |          |              |        |
| 0.5                  | 10                   | 0.7316   | 1.6414   | 1.2213       | 0.9977 |
| 0.5                  | 11                   | 0.7593   | 1.6080   | 1.2156       | 0.9980 |
| 0.5                  | 13                   | 0.6970   | 1.5124   | 1.1467       | 0.9975 |
| 0.5                  | 15                   | 0.5199   | 1.3612   | 1.0281       | 0.9978 |
| 0.5                  | 16                   | 0.5149   | 1.2866   | 0.8809       | 0.9976 |
